# Supplementary material
Source: PubMed Central journal article supplement (PMC3533428)

# Characterization of Differential Cocaine Metabolism in Mouse and Rat through Metabolomics-guided Metabolite Profiling

Dan Yao, Xiaolei Shi, Lei Wang, Blake A. Gosnell, Chi Chen

Department of Food Science and Nutrition, University of Minnesota, St. Paul, MN 55108

**Supplemental Fig. 1.** Tandem MS (MS/MS) spectra and structural elucidation of cocaine and cocaine metabolites. **A.** Cocaine (**I**). **B.** Norecgonine methyl ester (**II**). **C.** Ecgonine methyl ester (**III**). **D.** Benzoylnorecgonine (**IV**). **E.** Benzoylecgonine (**V**). **F.** Norcocaine (**VI**). **G.** Hydroxybenzoylnorecgonine (**VII**). **H.** *N*-hydroxybenzoylnorecgonine (**VIII**). **I.** Hydroxybenzoylecgonine (**IX**). **J.** Hydroxynorcocaine (**X**). **K.** Hydroxycocaine (**XI**). **L.** Cocaine-*N*-oxide (**XII**). **M.** Dihydroxycocaine (**XIII-XIV**). **N.** Hydroxymethoxybenzoylecgonine (**XV-XVI**). **O.** Hydroxymethoxynorcocaine (**XVII-XVIII**). **P.** Hydroxymethoxycocaine (**XIX-XX**). **Q.** Dihydroxymethoxycocaine (**XXI-XXIII**). **R.** Hydroxydimethoxynorcocaine (**XXIV-XXVI**). **S.** Hydroxydimethoxycocaine (**XXVII-XXVIII**). **T.** Hydroxymethoxynorcocaine glucuronide (**XXX-XXXII**). **U.** Hydroxymethoxycocaine glucuronide (**XXXIII-XXXIV**). **V.** Dihydroxymethoxycocaine glucuronide (**XXXV-XXXVIII**). **W.** Hydroxydimethoxynorcocaine glucuronide (**XXXIX-XXXX**). **X.** *N*-hydroxynorcocaine (NHNC). Major daughter ions from fragmentation were interpreted in the inlaid structural diagrams. The procedures of conducting accurate mass measurement and calculating elemental composition are described in the *Materials and Methods*.

**A**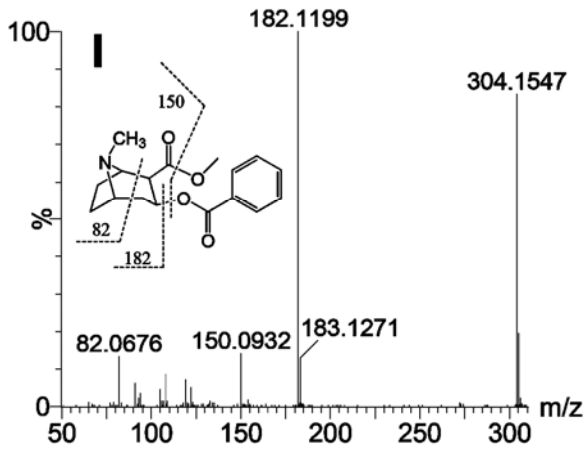**B**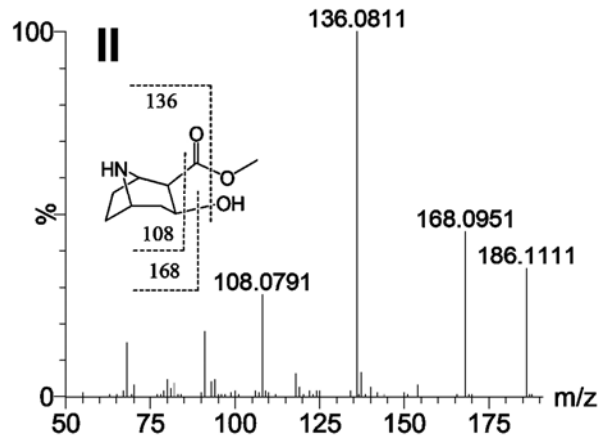**C**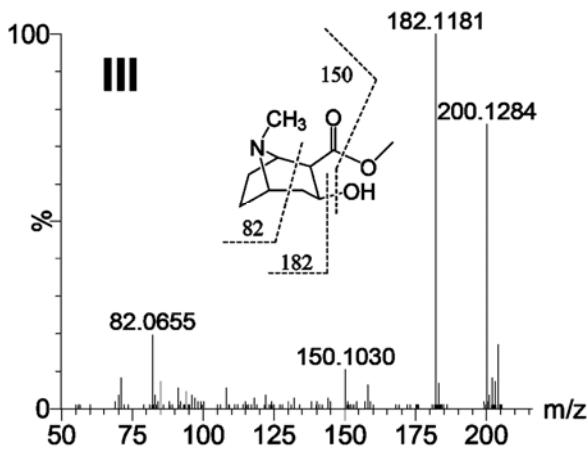**D**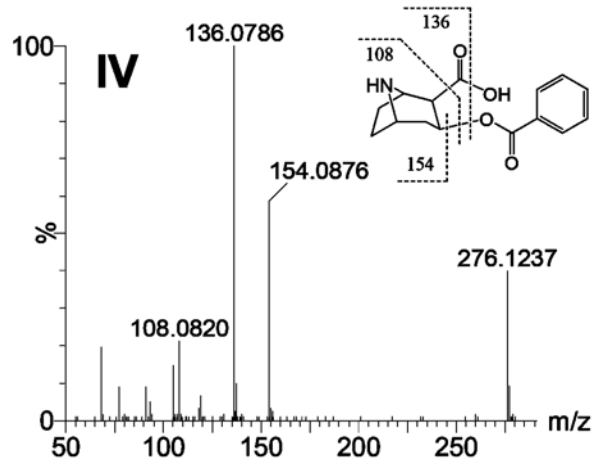**E**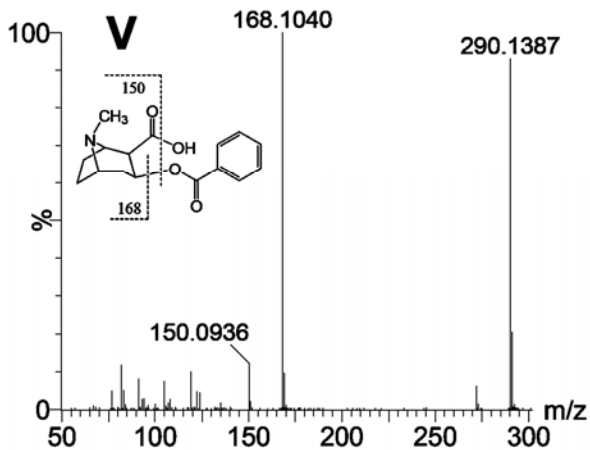**F**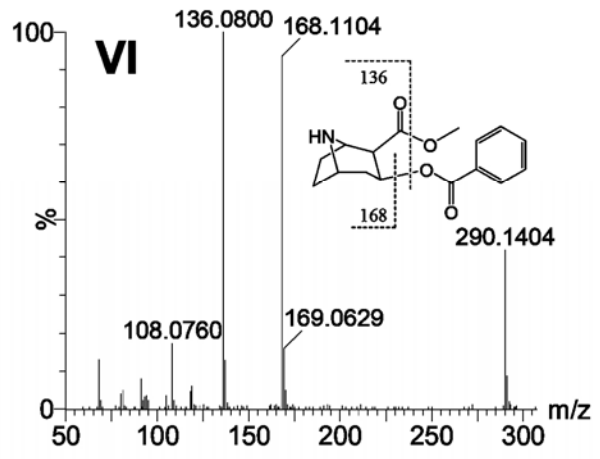

**G**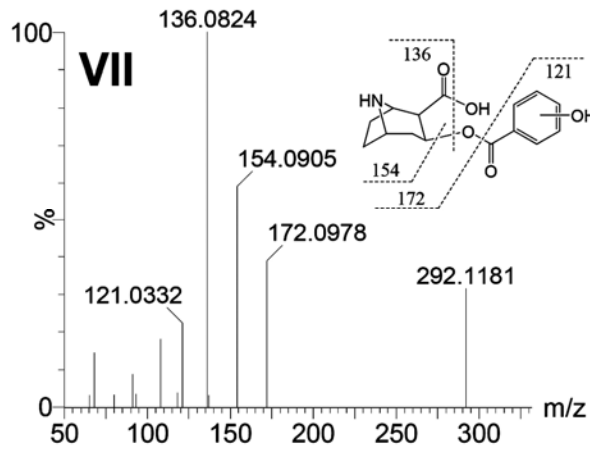**H**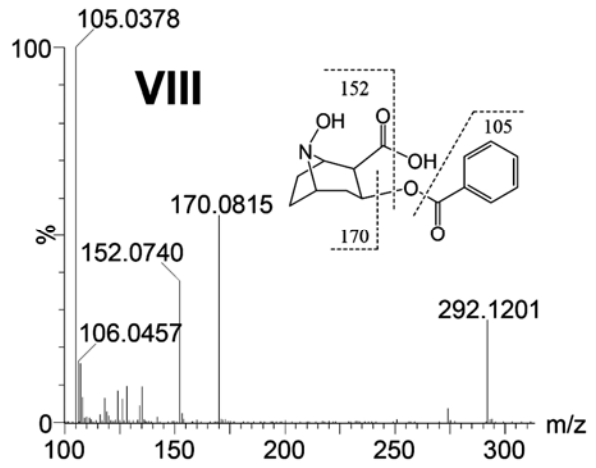**I**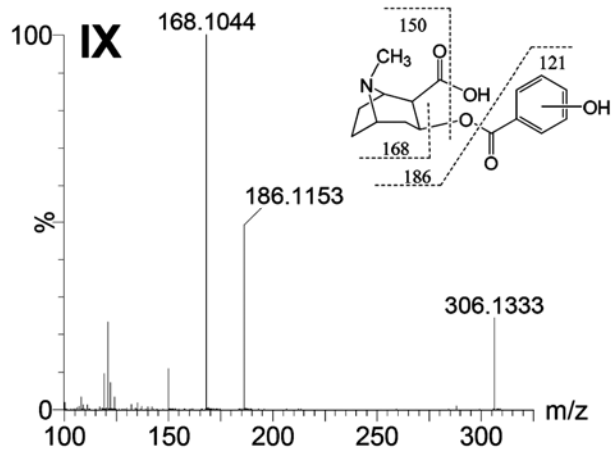**J**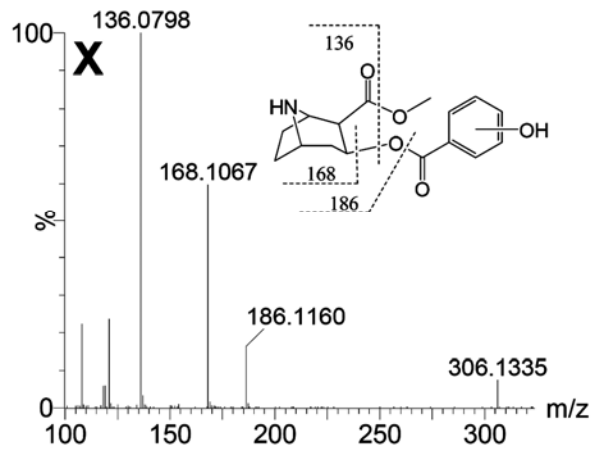**K**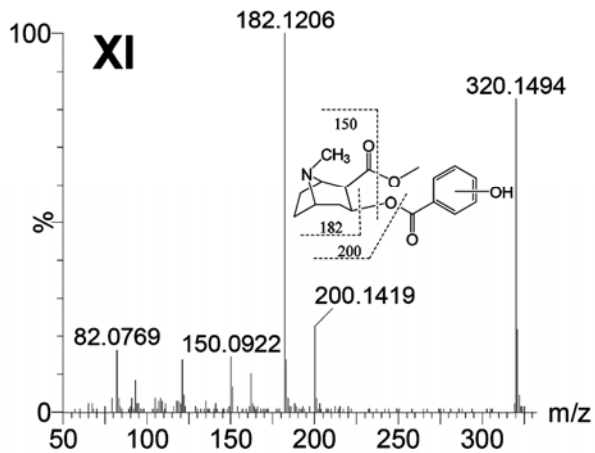**L**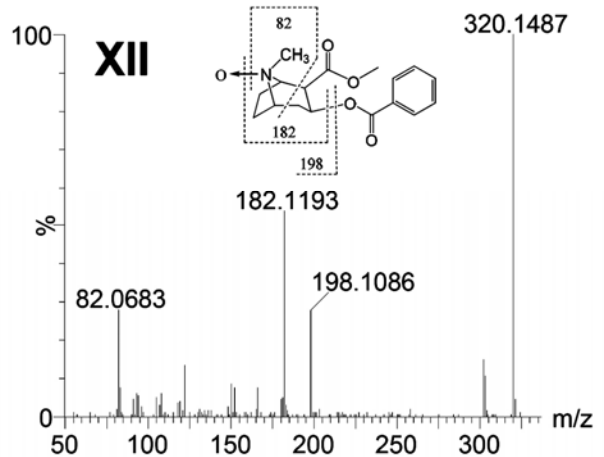

**M**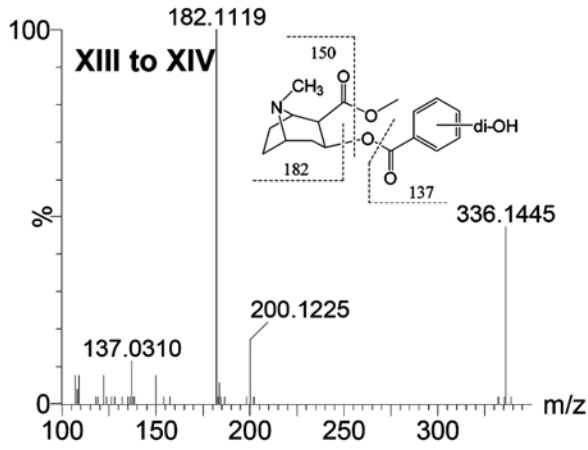**N**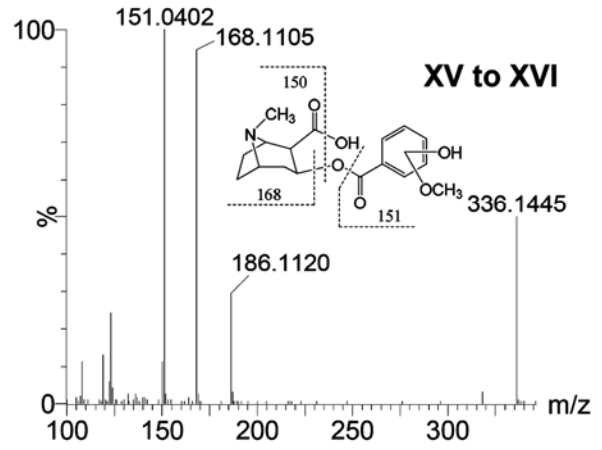**O**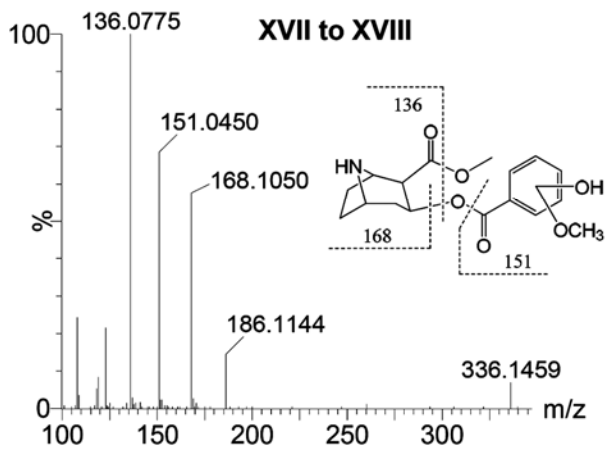**P**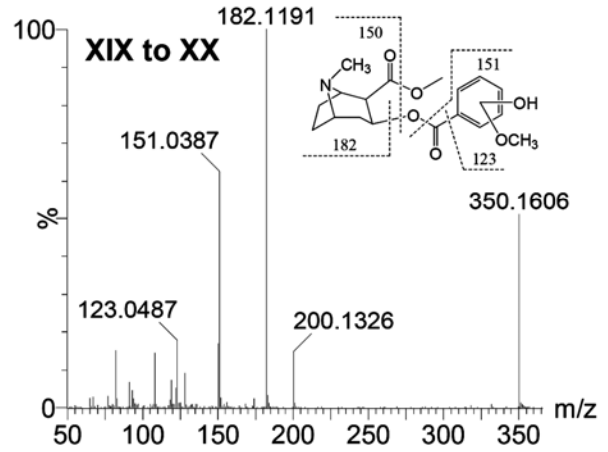**Q**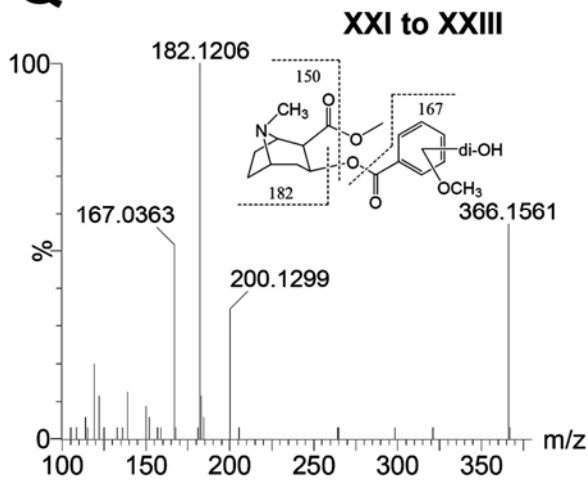**R**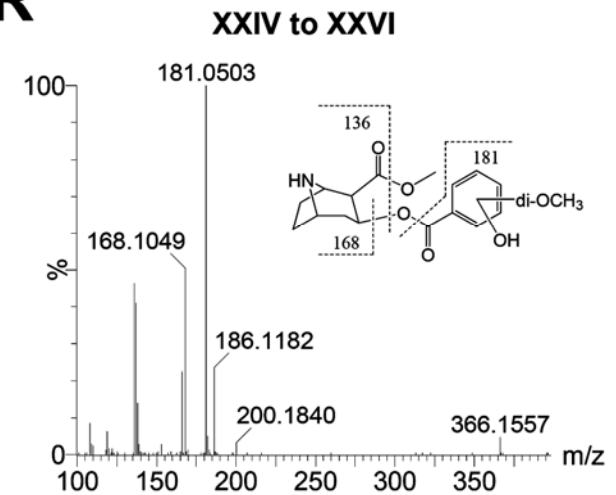

**S**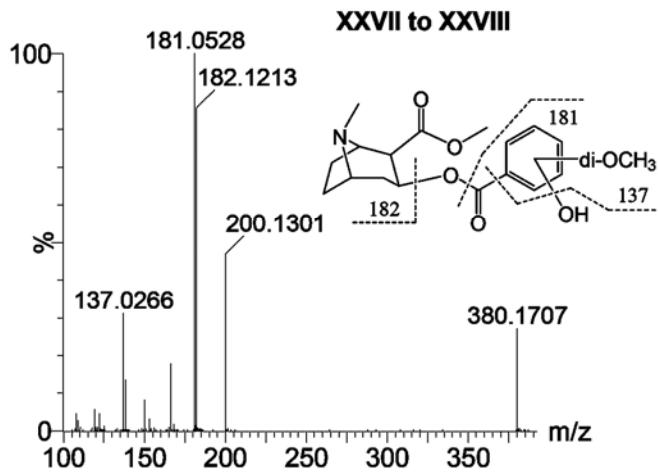**T**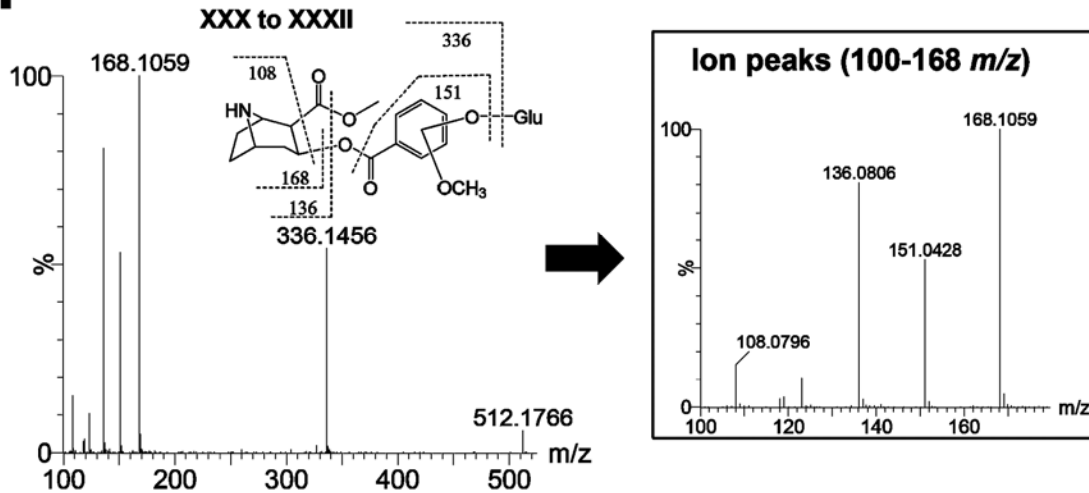**U**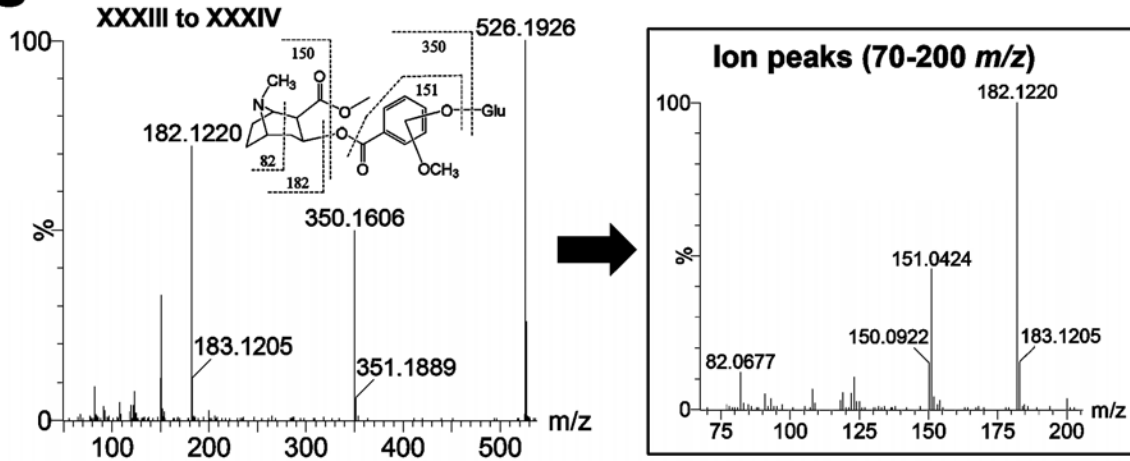

**V**

XXXV to XXXVIII

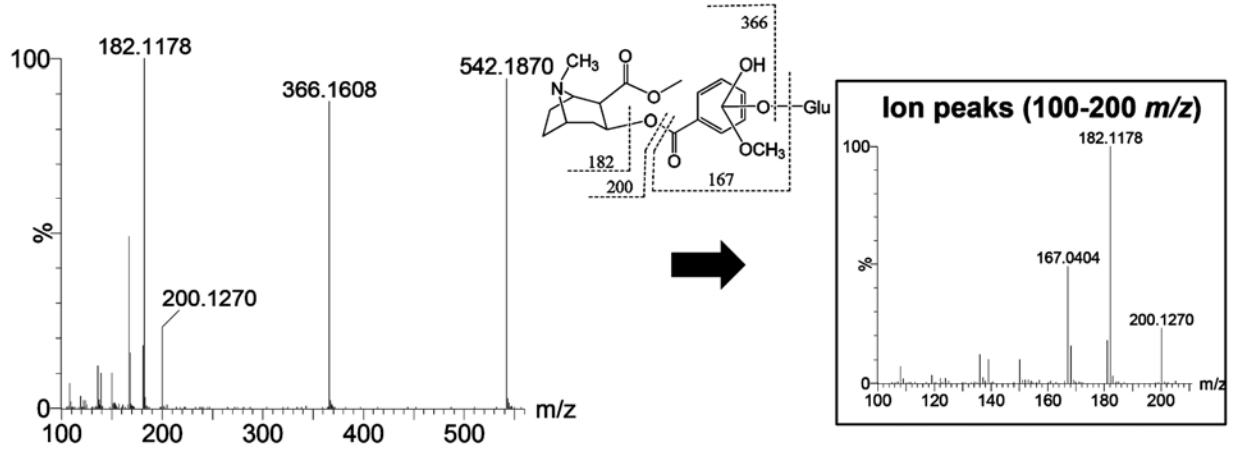**W**

XXXIX to XXXX

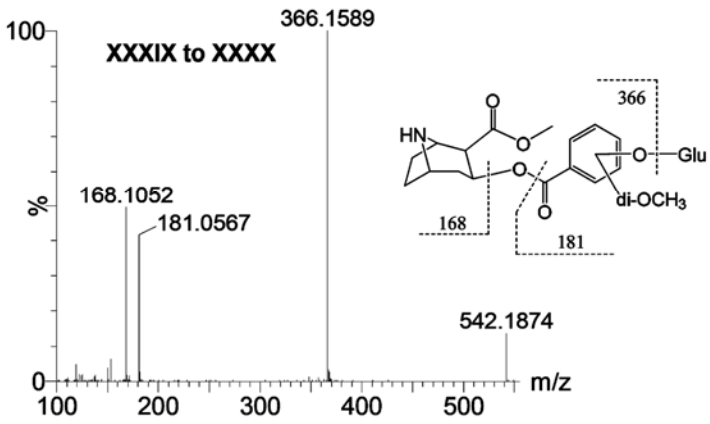**X**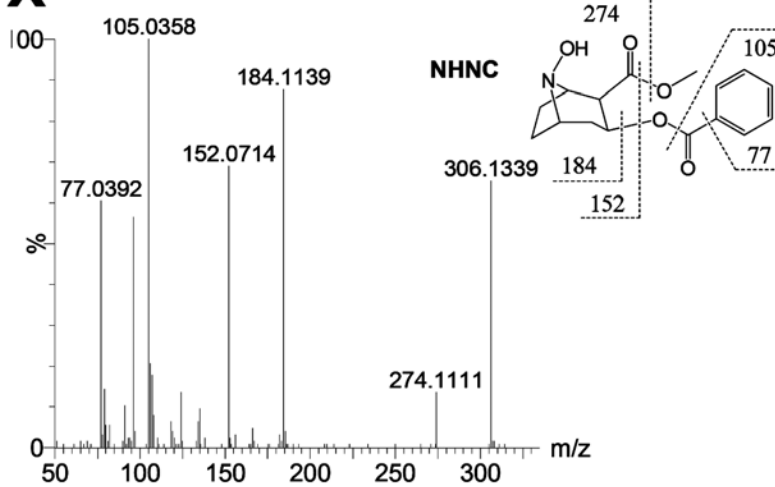

Supplement: supp_112.048678_DMD048678supplemental_figures.pdf [file supp_112.048678_DMD048678supplemental_figures.pdf]
